# Supplementary material
Source: Elsevier journal article supplement (https://www.sciencedirect.com/science/article/pii/S0034745020301256)
Supplement: mmc1 [file S0034745020301256:mmc1.docx]

**Anexo I – Ítems incluidos para medir la actitud de los profesionales de la salud mental ante la capacidad y el internamiento no voluntario de pacientes con anorexia nerviosa**

| **Datos sociodemográficos**  En primer lugar, le rogamos que rellene estos datos sociodemográficos.  **Q1**. Profesión  **Q2.** Sexo  **Q3.** Experiencia específica de más de tres meses en trastornos de conducta alimentaria  **Q4**. Número de años completos de experiencia profesional (incluyendo, en su caso, el periodo de formación como Interno/a Residente)  **Q5.** Formación de más de 20 horas en Bioética o pertenencia a Comité de Bioética  **Q6.** ¿Ha respaldado alguna vez una decisión o solicitud de internamiento no voluntario de un/a paciente mayor de edad por anorexia nerviosa? |
| --- |
| **Viñeta**  Se le va a plantear una viñeta narrando un caso clínico. A continuación, se realizarán una serie de afirmaciones con respecto al caso descrito. Indique su grado de acuerdo con las mismas, según una gradación que va desde 0, totalmente en desacuerdo, hasta 10, totalmente de acuerdo.  «Sandra tiene 18 años y está siendo tratada ambulatoriamente por anorexia nerviosa. Sandra se niega a subir de peso porque cree que está demasiado gorda. Entiende, al menos intelectualmente, que si continúa perdiendo peso puede poner en riesgo su salud y su vida. A pesar del tratamiento psicológico ambulatorio y el asesoramiento dietético, sigue perdiendo peso, que se sitúa en el 75% del peso esperable, con síntomas físicos asociados. Los exámenes médicos sugieren que su situación es grave desde el punto de vista médico, pero aún no es potencialmente mortal. Ella se opone a la recomendación de la facultativa de ingresar en el hospital. Su padre y su madre creen que ya no pueden cuidarla en casa y piden que la ingresen en el hospital.»  **Q7.** «Aunque Sandra parece intelectualmente capaz de comprender los riesgos, el hecho de que tenga anorexia nerviosa significa que su capacidad para rechazar el tratamiento puede estar comprometida.»  **Q8.** «Dado que el art. 763 de la Ley de Enjuiciamento Civil (art. 763 LEC) contempla la posibilidad de internamiento no voluntario por razón de trastorno psíquico, debería utilizarse al estar Sandra en grave peligro.»  **Q9.** «Dado el daño que la medida puede acarrear en la alianza terapéutica, puede ser preferible aguardar.» (I)  **Q11.** «Ya que Sandra parece entender los riesgos, su rechazo al tratamiento debe ser respetado en última instancia y determinar la decisión terapéutica final.» (I)  **Q12.** «Dado que Sandra es joven y sin antecedentes en el trastorno, el equipo que la trata debería mostrarse más abierto a forzar un tratamiento involuntario.»  **Q13.** «Para que Sandra tome cierta conciencia de la gravedad de su situación, puede ser apropiado forzar el internamiento.»  **Q14.** «Conviene forzar el ingreso para alcanzar un estado nutricional que favorezca la mejora psicopatológica.»  **Q15.** «Si en lugar de 18 años, Sandra hubiese alcanzado ya los 40 tras un curso crónico del trastorno y un historial de sucesivos internamientos previos, el equipo que la trata debería mostrarse más favorable a forzar un nuevo tratamiento involuntario.» |
| **Elección y responsabilidad**  A continuación, se realizarán una serie de afirmaciones sobre aspectos relativos a la capacidad de elección y responsabilidad de los pacientes con anorexia nerviosa. Indique su grado de acuerdo con las mismas, según una gradación que va desde 0, totalmente en desacuerdo, hasta 10, totalmente de acuerdo.  **Q16.** «El rechazo de los/las pacientes con anorexia nerviosa al tratamiento puede deberse al propio estado psicopatológico y, por lo tanto, diferir de sus genuinos deseos.»  **Q17.** «Los/las pacientes con anorexia nerviosa están en condiciones de controlar su propia dieta, ejercicio y conductas de purga.» (I)  **Q18.** «Algunos/as pacientes con anorexia nerviosa desean ser ayudados/as aunque manifiesten rechazo.»  **Q19.** «Los/las pacientes con anorexia nerviosa presentan dificultades de tipo emocional, distintas de los problemas de razonamiento, que condicionan su toma de decisiones de tratamiento.»  **Q20.** «Aun en el caso de tener deseos de curación, el hecho de padecer anorexia nerviosa supone una merma de la capacidad del/de la paciente para hacerse cargo de su propio cuidado.» |
| **Decisiones de tratamiento en anorexia nerviosa**  A continuación, se realizarán una serie de afirmaciones sobre aspectos relativos a decisiones de tratamiento en anorexia nerviosa. Indique su grado de acuerdo con las mismas, según una gradación que va desde 0, totalmente en desacuerdo, hasta 10, totalmente de acuerdo.  **Q21.** «El internamiento involuntario puede ser oportuno aun cuando los/las pacientes con anorexia nerviosa justifiquen de forma razonada su rechazo al ingreso.»  **Q22.** «Es inapropiado el empleo de alimentación forzosa de pacientes con anorexia nerviosa.» (I)  **Q23.** «El tratamiento de la anorexia nerviosa contra la voluntad del paciente está justificado si es probable que el paciente se recupere y tenga un buen pronóstico después del tratamiento.»  **Q24.** «El tratamiento de la anorexia nerviosa contra la voluntad del paciente encuentra normalmente mayor justificación en pacientes crónicos que en pacientes debutantes.» |

I: ítem invertido*.*

**Anexo 2 – Cuestionario de actitudes hacia el internamiento no voluntario y la capacidad en anorexia nerviosa (ACINOVAN)**

| **Instrucciones:** A continuación se presentan una viñeta clínica y una serie de afirmaciones y situaciones referidas a la capacidad de los pacientes con anorexia nerviosa y la toma de determinadas decisiones de tratamiento. Para responder, rodee con un círculo el número que mejor represente su grado de acuerdo con las mismas, según una gradación que va desde 0, totalmente en desacuerdo, hasta 10, totalmente de acuerdo. No hay respuestas correctas o incorrectas. Lo importante es su sincera opinión sobre cada una de las cuestiones planteadas. |
| --- |
| **Viñeta**  «Sandra tiene 18 años y está siendo tratada ambulatoriamente por anorexia nerviosa. Sandra se niega a subir de peso porque cree que está demasiado gorda. Entiende, al menos intelectualmente, que si continúa perdiendo peso puede poner en riesgo su salud y su vida. A pesar del tratamiento psicológico ambulatorio y el asesoramiento dietético, sigue perdiendo peso, que se sitúa en el 75% del peso esperable, con síntomas físicos asociados. Los exámenes médicos sugieren que su situación es grave desde el punto de vista médico, pero aún no es potencialmente mortal. Ella se opone a la recomendación de la facultativa de ingresar en el hospital. Su padre y su madre creen que ya no pueden cuidarla en casa y piden que la ingresen en el hospital.»  **I.1.** «Aunque Sandra parece intelectualmente capaz de comprender los riesgos, el hecho de que tenga anorexia nerviosa significa que su capacidad para rechazar el tratamiento puede estar comprometida.»   | Totalmente en desacuerdo | 0 | 1 | 2 | 3 | 4 | 5 | 6 | 7 | 8 | 9 | 10 | Totalmente de acuerdo | | --- | --- | --- | --- | --- | --- | --- | --- | --- | --- | --- | --- | --- |   **I.2.** «Dado que el art. 763 de la Ley de Enjuiciamento Civil (art. 763 LEC) contempla la posibilidad de internamiento no voluntario por razón de trastorno psíquico, debería utilizarse al estar Sandra en grave peligro.»   | Totalmente en desacuerdo | 0 | 1 | 2 | 3 | 4 | 5 | 6 | 7 | 8 | 9 | 10 | Totalmente de acuerdo | | --- | --- | --- | --- | --- | --- | --- | --- | --- | --- | --- | --- | --- |   **I.3.** «Dado el daño que la medida puede acarrear en la alianza terapéutica puede ser preferible aguardar.»   | Totalmente en desacuerdo | 0 | 1 | 2 | 3 | 4 | 5 | 6 | 7 | 8 | 9 | 10 | Totalmente de acuerdo | | --- | --- | --- | --- | --- | --- | --- | --- | --- | --- | --- | --- | --- |   **I.4.** «Ya que Sandra parece entender los riesgos, su rechazo al tratamiento debe ser respetado en última instancia y determinar la decisión terapéutica final.» (I)   | Totalmente en desacuerdo | 0 | 1 | 2 | 3 | 4 | 5 | 6 | 7 | 8 | 9 | 10 | Totalmente de acuerdo | | --- | --- | --- | --- | --- | --- | --- | --- | --- | --- | --- | --- | --- |   **I.5.** «Dado que Sandra es joven y sin antecedentes en el trastorno, el equipo que la trata debería mostrarse más abierto a forzar un tratamiento involuntario.»   | Totalmente en desacuerdo | 0 | 1 | 2 | 3 | 4 | 5 | 6 | 7 | 8 | 9 | 10 | Totalmente de acuerdo | | --- | --- | --- | --- | --- | --- | --- | --- | --- | --- | --- | --- | --- |   **I.6.** «Para que Sandra tome cierta conciencia de la gravedad de su situación, puede ser apropiado forzar el internamiento.»   | Totalmente en desacuerdo | 0 | 1 | 2 | 3 | 4 | 5 | 6 | 7 | 8 | 9 | 10 | Totalmente de acuerdo | | --- | --- | --- | --- | --- | --- | --- | --- | --- | --- | --- | --- | --- |   **I.7.** «Conviene forzar el ingreso para alcanzar un estado nutricional que favorezca la mejora psicopatológica.»   | Totalmente en desacuerdo | 0 | 1 | 2 | 3 | 4 | 5 | 6 | 7 | 8 | 9 | 10 | Totalmente de acuerdo | | --- | --- | --- | --- | --- | --- | --- | --- | --- | --- | --- | --- | --- |   **I.8.** «Si en lugar de 18 años, Sandra hubiese alcanzado ya los 40 años tras un curso crónico del trastorno y un historial de sucesivos internamientos previos, el equipo que la trata debería mostrarse más favorable a forzar un nuevo tratamiento involuntario.»   | Totalmente en desacuerdo | 0 | 1 | 2 | 3 | 4 | 5 | 6 | 7 | 8 | 9 | 10 | Totalmente de acuerdo | | --- | --- | --- | --- | --- | --- | --- | --- | --- | --- | --- | --- | --- | |  |  |  |  |  |  |  |  |  |  |  |  |  | |
| **Elección y responsabilidad**  **I.9.** «El rechazo de los pacientes con anorexia nerviosa al tratamiento puede deberse al propio estado psicopatológico y, por lo tanto, diferir de sus genuinos deseos.»   | Totalmente en desacuerdo | 0 | 1 | 2 | 3 | 4 | 5 | 6 | 7 | 8 | 9 | 10 | Totalmente de acuerdo | | --- | --- | --- | --- | --- | --- | --- | --- | --- | --- | --- | --- | --- |   **I.10.** «Los pacientes con anorexia nerviosa están en condiciones de controlar su propia dieta, ejercicio y conductas de purga.»   | Totalmente en desacuerdo | 0 | 1 | 2 | 3 | 4 | 5 | 6 | 7 | 8 | 9 | 10 | Totalmente de acuerdo | | --- | --- | --- | --- | --- | --- | --- | --- | --- | --- | --- | --- | --- |   **I.11.** «Los pacientes con anorexia nerviosa presentan dificultades de tipo emocional, distintas de los problemas de razonamiento, que condicionan su toma de decisiones de tratamiento.»   | Totalmente en desacuerdo | 0 | 1 | 2 | 3 | 4 | 5 | 6 | 7 | 8 | 9 | 10 | Totalmente de acuerdo | | --- | --- | --- | --- | --- | --- | --- | --- | --- | --- | --- | --- | --- |   **I.12.** «Aun en el caso de tener deseos de curación, el hecho de padecer anorexia nerviosa supone una merma de la capacidad del paciente para hacerse cargo de su propio cuidado.»   | Totalmente en desacuerdo | 0 | 1 | 2 | 3 | 4 | 5 | 6 | 7 | 8 | 9 | 10 | Totalmente de acuerdo | | --- | --- | --- | --- | --- | --- | --- | --- | --- | --- | --- | --- | --- | |
| **Decisiones de tratamiento**  **I.13.** «El tratamiento de la anorexia nerviosa contra la voluntad del paciente encuentra normalmente mayor justificación en pacientes crónicos que en pacientes debutantes.»   | Totalmente en desacuerdo | 0 | 1 | 2 | 3 | 4 | 5 | 6 | 7 | 8 | 9 | 10 | Totalmente de acuerdo | | --- | --- | --- | --- | --- | --- | --- | --- | --- | --- | --- | --- | --- | |

Clave de corrección: se realizan las siguientes operaciones aritméticas, a partir de los valores marcados en cada ítem, según las siguientes subescalas:

Prointervención (PRO) = (I.2 + I.3 + (10 – I.4) + I.6 + I.7) / 5.

Ausencia de capacidad (AUS) = (I.1 + I.9 + (10 – I.10) + I.11 + I.12) / 5.

Cronicidad (CRO) = (I.5 + I.8 + I.13) / 3.
